# Supplementary material for: Visual mode switching learned through repeated adaptation to color
Source: eLife. 2020 Dec 15;9:e61179. doi: 10.7554/eLife.61179 (PMC7738184; doi:10.7554/eLife.61179)
Supplement: Figure 2—source data 1. [file elife-61179-fig2-data1.xlsx]

## Sheet: Sheet1
Test number	Unique yellow (Hue angle)	Standard error
1	298.122	2.0206
2	225.103	4.85978
3	230.832	5.26199
4	236.902	5.79344
5	241.643	5.93271
6	248.804	6.8246
7	313.23	2.56734
8	304.455	2.03451
9	300.895	2.15246
10	298.108	2.13486
11	295.806	1.99912
12	231.602	6.40353
13	237.329	6.9221
14	239.034	7.07139
15	238.082	7.02595
16	248.931	7.20537
17	310.834	3.14795
18	299.674	2.20811
19	296.355	2.49348
20	293.041	1.50567
21	296.881	2.16548
22	236.39	6.35553
23	236.869	6.41868
24	237.58	6.76958
25	241.764	6.95784
26	242.377	5.41101
27	309.448	2.69428
28	299.944	2.00476
29	295.818	1.79518
30	294.265	1.82972
31	292.78	2.11681
32	239.575	6.1753
33	237.356	7.14055
34	243.057	8.08785
35	245.068	7.95542
36	247.073	7.03901
37	305.543	2.78791
38	297.152	2.2374
39	292.118	2.19383
40	290.444	2.15427
41	294.188	2.11769
42	233.897	6.34835
43	232.644	6.58433
44	238.091	5.78569
45	244.006	5.48584
46	244.737	6.11513
47	305.149	2.54765
48	298.327	2.13361
49	294.601	2.19064
50	292.858	1.92958
51	291.01	1.51093
52	232.26	6.68311
53	233.772	6.60909
54	242.015	6.34617
55	243.745	5.62391
56	249.055	5.24375
57	303.573	2.59099
58	294.442	1.98024
59	291.387	1.60581
60	289.527	1.72639
61	292.274	2.40121
62	241.868	7.15243
63	244.114	5.85957
64	252.358	6.3442
65	255.884	6.10488
66	257.819	6.19387
67	305.069	2.88159
68	297.482	2.31194
69	294.802	2.16039
70	292.425	1.92852
71	289.047	1.90266
72	249.04	6.85808
73	251.541	6.47968
74	258.876	6.9776
75	260.899	6.88796
76	259.622	5.81239
77	302.813	2.87722
78	294.673	2.2833
79	290.461	2.03241
80	288.091	2.21225
81	291.798	2.17119
82	255.556	6.95839
83	254.39	7.24284
84	262.571	5.103
85	265.833	5.55544
86	266.478	4.70374
87	303.508	2.96704
88	295.241	2.47292
89	293.053	2.36137
90	290.457	2.594
91	288.828	2.46096
92	257.964	6.76052
93	259.567	6.46824
94	264.39	5.80353
95	268.738	5.93254
96	271.664	5.43527
97	300.916	2.79366
98	292.502	2.29529
99	291.569	2.36057
100	286.923	2.26608
101	290.566	2.11729
102	243.591	5.70159
103	247.126	6.25609
104	254.975	5.87782
105	257.107	5.33671
106	260.684	5.87092
107	302.032	2.5625
108	292.027	2.25031
109	289.65	2.13168
110	287.918	2.05753
