# Supplementary material for: Visual mode switching learned through repeated adaptation to color
Source: eLife. 2020 Dec 15;9:e61179. doi: 10.7554/eLife.61179 (PMC7738184; doi:10.7554/eLife.61179)
Supplement: Figure 3—source data 1. [file elife-61179-fig3-data1.xlsx]

## Sheet: rapid adjustment
Session number	Baseline-corrected unique yellow (Hue angle)	Linear fit
1	-73.0191	-72.5989
2	-66.5202	-68.5386
3	-60.4918	-64.4782
4	-57.3061	-60.4179
5	-60.291	-56.3575
6	-61.9281	-52.2972
7	-50.4063	-48.2368
8	-43.2348	-44.1765
9	-36.242	-40.1161
10	-33.8342	-36.0558

## Sheet: total adaptation
Session number	Baseline-corrected unique yellow (Hue angle)	Linear fit
1	-49.3182	-57.0065
2	-48.557	-53.4556
3	-54.5048	-49.9047
4	-49.8079	-46.3539
5	-50.3923	-42.803
6	-45.1334	-39.2521
7	-34.4558	-35.7012
8	-32.6521	-32.1503
9	-25.3198	-28.5995
10	-20.1342	-25.0486

## Sheet: aftereffects
Session number	Baseline-corrected unique yellow (Hue angle)	Linear fit
1	15.1081	12.9983
2	12.7117	12.6332
3	12.5662	12.2681
4	8.6617	11.903
5	10.9604	11.5378
6	9.38451	11.1727
7	12.7943	10.8076
8	10.5384	10.4425
9	11.7098	10.0773
10	9.11753	9.71221
