# Supplementary material for: Visual mode switching learned through repeated adaptation to color
Source: eLife. 2020 Dec 15;9:e61179. doi: 10.7554/eLife.61179 (PMC7738184; doi:10.7554/eLife.61179)
Supplement: Figure 4—source data 1. [file elife-61179-fig4-data1.xlsx]

## Sheet: Glasses-on
Test number	Relative gains of cones (L/M)	Standard error
1	2.61337	0.0437128
2	2.662	0.0477339
3	2.72119	0.0552197
4	2.76566	0.0593397
5	2.84185	0.0684783
6	2.6732	0.0600205
7	2.73161	0.0654934
8	2.74597	0.0693459
9	2.73581	0.0688366
10	2.84688	0.0709821
11	2.71656	0.061727
12	2.72152	0.0620845
13	2.72799	0.0653239
14	2.77134	0.0684084
15	2.7698	0.0555454
16	2.74717	0.0616698
17	2.7267	0.0709821
18	2.78596	0.0817986
19	2.79879	0.0814862
20	2.81845	0.0724527
21	2.68953	0.0620334
22	2.6772	0.0640251
23	2.72785	0.058348
24	2.78636	0.0567672
25	2.79567	0.0627322
26	2.67442	0.0663446
27	2.68841	0.066762
28	2.76589	0.0648606
29	2.78466	0.0568693
30	2.84048	0.053111
31	2.7681	0.0724315
32	2.78896	0.0594128
33	2.87842	0.0640874
34	2.91402	0.0606866
35	2.92996	0.0628303
36	2.84142	0.0699814
37	2.86619	0.0681703
38	2.93905	0.0730712
39	2.95699	0.0708796
40	2.9467	0.059984
41	2.90625	0.0716204
42	2.89195	0.0728536
43	2.97763	0.0519581
44	3.0098	0.0559315
45	3.02026	0.0478133
46	2.93149	0.069455
47	2.94832	0.0684157
48	2.99822	0.0611258
49	3.04324	0.0620866
50	3.07482	0.0561156

## Sheet: Baseline
Test number	Relative gains of cones (L/M)	Standard error
1	1.11792	0.0025427
2	1.11486	0.00268192
3	1.11631	0.00290984
4	1.11058	0.00315441
5	1.11257	0.00292223
6	1.10817	0.00227756
7	1.10959	0.00351346
8	1.10465	0.00286394
9	1.10889	0.00315781
10	1.1042	0.00391919
