# Supplementary material for: Visual mode switching learned through repeated adaptation to color
Source: eLife. 2020 Dec 15;9:e61179. doi: 10.7554/eLife.61179 (PMC7738184; doi:10.7554/eLife.61179)
Supplement: Figure 5—source data 1. [file elife-61179-fig5-data1.xlsx]

## Sheet: Individual participant1
Test number	Unique yellow with glasses on(Hue angle)	Standard Error			Test number	Unique yellow baseline (Hue angle)	Standard Error
1	200	0			1	309.632	2.57726
2	204.619	4.65055			2	304.124	3.90278
3	206.489	5.5167			3	305.055	1.28335
4	224.225	11.2508			4	294.889	3.6001
5	212.299	7.34573			5	293.744	5.45934
6	205.225	5.90858			6	291.119	2.98881
7	208.542	5.71105			7	293.198	4.38943
8	221.874	6.43823			8	282.178	5.49519
9	226.763	3.58363			9	286.966	4.62456
10	242.492	3.70949			10	282.929	3.68834
11	214.664	3.92289			11	294.209	4.84504
12	222.57	2.79555
13	232.287	4.29828
14	240.386	7.52536
15	241.074	6.10136
16	218.964	7.82797
17	212.641	5.75276
18	220.585	6.90709
19	232.145	4.17589
20	239.754	4.54383
21	236.451	5.34388
22	228.843	6.22474
23	237.322	3.94792
24	241.383	6.63533
25	237.98	6.59202
26	224.813	7.48086
27	219.792	4.64232
28	230.966	4.423
29	239.234	4.86652
30	239.937	5.38539
31	230.015	8.02182
32	225.941	3.30104
33	228.41	5.13751
34	234.343	6.15487
35	241.359	6.06696
36	222.845	5.56903
37	218.553	3.57652
38	227.504	5.95265
39	236.794	3.13321
40	240.193	9.28697
41	241.599	5.7968
42	233.215	3.31048
43	248.423	3.07723
44	248.29	9.32612
45	257.749	2.94586
46	244.034	7.27167
47	238.886	5.59767
48	249.548	9.569
49	262.75	5.42221
50	274.434	3.33145
51	236.101	8.59226
52	249.779	6.12227
53	255.311	3.6279
54	260.435	4.9442
55	265.717	4.23118

## Sheet: Individual participant2
Test number	Unique yellow with glasses on(Hue angle)	Standard Error			Test number	Unique yellow baseline (Hue angle)	Standard Error
1	228.241	11.8931			1	304.459	4.41174
2	230.74	5.21733			2	303.761	3.6224
3	221.669	4.13712			3	299.668	3.15067
4	219.638	4.28472			4	305.471	1.77602
5	229.08	6.41112			5	297.131	1.29855
6	204.353	3.5409			6	291.858	1.70475
7	215.63	9.43073			7	290.979	1.50342
8	204.896	3.72974			8	294.972	3.04166
9	215.427	10.074			9	290.997	1.85247
10	NaN	NaN			10	292.819	1.7376
11	214.805	4.27208			11	288.779	2.5275
12	221.832	4.55179
13	212.212	4.97213
14	211.657	5.70611
15	226.135	6.61922
16	224.644	9.45712
17	218.032	4.36463
18	215.306	1.53298
19	214.403	5.54893
20	224.387	10.961
21	202.808	3.95125
22	203.814	3.45325
23	208.361	5.30843
24	214.689	9.99278
25	210.744	4.38369
26	205.159	1.44233
27	206.437	3.13048
28	207.612	3.96912
29	209.047	3.98092
30	209.888	2.64693
31	213.946	4.92349
32	207.474	5.35105
33	207.101	7.0937
34	213.859	10.1532
35	214.581	6.32368
36	212.913	4.96139
37	221.988	9.95425
38	219.306	7.10369
39	224.929	7.76635
40	235.871	7.20669
41	230.96	3.30149
42	215.786	7.09167
43	233.986	6.9326
44	234.349	9.96625
45	238.571	10.232
46	223.606	10.5923
47	219.552	9.54883
48	231.904	5.18971
49	225.264	4.74789
50	231.542	6.95168
51	221.25	8.71072
52	214.651	5.74077
53	222.52	8.79468
54	226.808	7.67897
55	222.009	9.00725

## Sheet: Test-retest scatter plot
Day5 - day1	Follow-up - day1
21.6592	21.0715
19.639	-13.9431
36.3168	25.0764
53.0431	33.1581
31.5497	9.19085
58.5433	31.3473
-7.33548	0.916172
44.0344	36.1012
50.5891	17.7701
58.0704	49.6711
-4.63454	-6.99095
